# Supplementary material
Source: Springer Nature journal article supplement (https://www.springermedizin.de/resource/supplementary/12937_2007_143_MOESM1_ESM.pdf/25654488)
Supplement: MOESM1 [file 25654488]

## The Calcium Rapid Assessment Method

### FOOD FREQUENCY QUESTIONNAIRE

Record the number of servings you ate on a typical day in the previous 7 days.

*(Use the pictures to estimate serving sizes)*

| MILK -YOGURT-CHEESE                            | # SERVINGS DAILY |
|------------------------------------------------|------------------|
| Cheese, 1oz or 6 tbsp.                         |                  |
| Cottage cheese, 1/2 cup                        |                  |
| Custard, pudding, or cream pie, 1/2 cup        |                  |
| Ice cream, frozen yogurt, or milk shake, 1 cup |                  |
| Milk or cocoa, 1 cup                           |                  |
| Soy milk, 1 cup                                |                  |
| Yogurt, 1 cup                                  |                  |
| Cream soups/sauce, 1 cup                       |                  |
| Macaroni and cheese, 1cup                      |                  |
| Pizza, 1/8 of 15" (8 slice pizza)              |                  |
| Quiche, 1/8 of 8"                              |                  |
|                                                |                  |

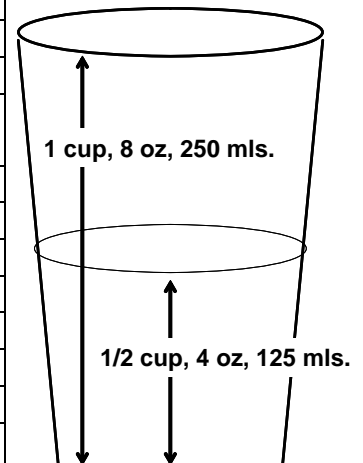

| FRUITS and VEGETABLES                                                            | # SERVINGS DAILY |
|----------------------------------------------------------------------------------|------------------|
| Broccoli or cooked greens (beet/turnip greens, kale, collards, spinach), 1/2 cup |                  |
| Other vegetables, 1/2 cup                                                        |                  |
| Orange juice, 1 cup (enriched with calcium)                                      |                  |
| Fruits, 1/2 cup or 1 small                                                       |                  |
|                                                                                  |                  |
| MEAL REPLACEMENT PRODUCTS                                                        | # SERVINGS DAILY |
| Slim fast, 1 can                                                                 |                  |
| Jenny Craig bar, 1 bar                                                           |                  |
| Other: _____                                                                     |                  |
|                                                                                  |                  |

- Fist = 1 cup or 1 medium whole fruit
- Thumb (tip to base) = 1 oz. of meat or cheese
- Thumb tip (tip to 1<sup>st</sup> joint) = tbsp.
- Index finger (1<sup>st</sup> to 2<sup>nd</sup> joint) = 1"
- Palm (minus fingers) = 3 oz. of meat, fish, or poultry

| <b>BREADS-CEREALS-RICE-PASTA</b>            | <b># SERVINGS DAILY</b> |
|---------------------------------------------|-------------------------|
| Bread, 1 slice                              |                         |
| Bread, 1 slice (enriched with calcium)      |                         |
| Cereal, 1 oz                                |                         |
| Cereal, 1 oz (enriched with calcium)        |                         |
| 2" biscuit/roll                             |                         |
| 6" corn tortilla                            |                         |
| 3" muffin, cornbread, or doughnut           |                         |
| Rice, noodles, or pasta, 1 cup              |                         |
| Pancake, waffle, or French toast, 1 serving |                         |

| <b>FAT-SUGAR-ALCOHOL</b>                       | <b># SERVINGS DAILY</b> |
|------------------------------------------------|-------------------------|
| Cake, 1/16 of 9"                               |                         |
| Beer, 12oz                                     |                         |
| Colas, 12oz                                    |                         |
| Chocolate, 1oz                                 |                         |
|                                                |                         |
| <b>MEAT-FISH-POULTRY-DRY BEANS-NUTS</b>        | <b># SERVINGS DAILY</b> |
| Dry beans, cooked (navy, pinto, kidney), 1 cup |                         |
| Meat, fish, poultry, 3 oz                      |                         |
| Peanuts, 1/2 cup                               |                         |
| Almonds, 1/2 cup                               |                         |
| 1 egg                                          |                         |
| Salmon (with bones), 3oz                       |                         |
| Sardine (with bones), 3 oz                     |                         |
| 3oz shrimp                                     |                         |
| 7 to 9 oysters                                 |                         |
| Tofu, 2 1/2"x 2 1/2"x 1"                       |                         |
